# Supplementary material for: COVID-19 Outcomes in a US Cohort of Persons Living with HIV (PLWH)
Source: MDPI journal article supplement (doi:10.3390/reports5040041), 2022-10-09
Supplement: s1 [file s1]

**SUPPLEMENTAL TABLE S2: Characteristics of persons living with HIV who completed SARS-CoV-2 testing with and without infection**

| Characteristic                                                                  | (NO) SARS-CoV-2<br>(n=1351) | (YES) SARS-CoV-2<br>(n=281) | <i>p</i> -<br>value |
|---------------------------------------------------------------------------------|-----------------------------|-----------------------------|---------------------|
| Age mean years (SD)                                                             | 51.2 (13.6)                 | 51.5 (12.74)                | 0.698               |
| Sex at Birth, n (%)                                                             |                             |                             |                     |
| Male                                                                            | 783 (58)                    | 177 (63)                    | 0.135               |
| Female                                                                          | 568 (42)                    | 104 (37)                    |                     |
| Race, n (%)                                                                     |                             |                             |                     |
| African-American/Black                                                          | 1090 (82)                   | 237 (86)                    | 0.009               |
| White                                                                           | 177 (13)                    | 20 (7)                      |                     |
| Other                                                                           | 58 (4)                      | 18 (7)                      |                     |
| Ethnicity, n (%)                                                                |                             |                             |                     |
| Non-Hispanic                                                                    | 1285 (99)                   | 258 (98)                    | 0.088               |
| Hispanic                                                                        | 11 (1)                      | 6 (2)                       |                     |
| Insurance, n (%)                                                                |                             |                             |                     |
| Private                                                                         | 706 (52)                    | 161 (58)                    | 0.251               |
| Medicaid                                                                        | 350 (26)                    | 67 (24)                     |                     |
| Medicare                                                                        | 271 (20)                    | 45 (16)                     |                     |
| Non-Insured                                                                     | 20 (2)                      | 6 (2)                       |                     |
| Median CD4 + T Lymphocytes cells/mm <sup>3</sup><br>n, [IQR] <sup>a</sup>       | 552 [310,798]               | 623 [383, 938]              | 0.159               |
| Median Nadir CD4 + T Lymphocytes<br>cells/mm <sup>3</sup> n, [IQR] <sup>b</sup> | 413 [219, 654]              | 533[314, 724]               | 0.036               |
| HIV Viral Load copies/mL <200, n (%) <sup>c</sup>                               | 201(87)                     | 50 (87)                     | 1                   |
| Current HIV Treatments, n (%)                                                   |                             |                             |                     |
| INSTI                                                                           | 716 (52)                    | 148 (53)                    | 0.972               |
| PI                                                                              | 432 (32)                    | 77 (27)                     | 0.151               |
| NNRTI                                                                           | 312 (23)                    | 74 (26)                     | 0.278               |
| NRTI                                                                            | 1060 (79)                   | 227 (81)                    | 0.431               |
| Co-Morbid Conditions, n (%)                                                     |                             |                             |                     |
| Cardiovascular Disease                                                          | 877 (65)                    | 174 (62)                    | 0.376               |
| Hypertension                                                                    | 827 (61)                    | 165 (59)                    | 0.476               |
| Obesity                                                                         | 447 (33)                    | 111 (40)                    | 0.046               |
| Chronic Liver Disease                                                           | 407 (30)                    | 70 (25)                     | 0.094               |
| Diabetes Mellitus                                                               | 386 (29)                    | 92 (33)                     | 0.185               |
| Chronic Renal Disease                                                           | 423 (31)                    | 69 (25)                     | 0.030               |
| Malignancy                                                                      | 123 (9)                     | 28 (10)                     | 0.734               |
| Transplant                                                                      | 50 (3)                      | 8 (3)                       | 0.599               |

Abbreviations: PLWH, persons living with HIV; N, number; SD, standard deviation; IQR, interquartile range; mL, milliliter; INSTI, integrase inhibitor; PI, protease inhibitor; NNRTI, non-nucleoside reverse transcriptase inhibitors; NRTI, nucleoside reverse transcriptase inhibitor

<sup>a</sup>Where available the most recent CD4+ T lymphocyte count within one year prior to the SARS-CoV-2 infection was abstracted.

<sup>b</sup>The lowest ever CD4+ T lymphocyte count available in the MedStar database was abstracted.

‘Where available the most recent HIV viral load within one year prior to the SARS-CoV-2 infection was abstracted
