# Supplementary material for: COVID-19 Outcomes in a US Cohort of Persons Living with HIV (PLWH)
Source: MDPI journal article supplement (doi:10.3390/reports5040041), 2022-10-09
Supplement: s1 [file s1]

**SUPPLEMENTAL TABLE S1: Characteristics of PLWH and SARS-CoV-2 testing status**

|                                                          | All (n= 20662) | SARS-CoV-2<br>Tested (NO)<br>(n=19030) | SARS-CoV-2<br>Tested (YES)<br>(n=1632) |
|----------------------------------------------------------|----------------|----------------------------------------|----------------------------------------|
| Mean Age, years (SD)                                     | 51.9 (13.8)    | 51.9 (13.8)                            | 51.2 (13.4)                            |
| Sex at Birth, n (%)                                      |                |                                        |                                        |
| Male                                                     | 13296 (79)     | 12336 (65)                             | 960 (59)                               |
| Female                                                   | 7363 (36)      | 6691 (26)                              | 672 (41)                               |
| Race, n (%)                                              |                |                                        |                                        |
| African-American/Black                                   | 15592 (79)     | 14265 (78)                             | 1327 (83)                              |
| White                                                    | 3262 (16)      | 3065 (17)                              | 197 (12)                               |
| Other                                                    | 976 (5)        | 900 (5)                                | 76 (5)                                 |
| Ethnicity, n (%)                                         |                |                                        |                                        |
| Non-Hispanic                                             | 18945 (98)     | 17402 (98)                             | 1543 (99)                              |
| Hispanic                                                 | 476 (3)        | 459 (3)                                | 17 (1)                                 |
| Insurance, n (%)                                         |                |                                        |                                        |
| Private                                                  | 10580 (51)     | 9713 (51)                              | 867 (53)                               |
| Medicaid                                                 | 5555 (27)      | 5138 (27)                              | 417 (26)                               |
| Medicare                                                 | 3431 (17)      | 3115 (16)                              | 316 (19)                               |
| Non-Insured                                              | 1000 (5)       | 974 (5)                                | 26 (2)                                 |
| Median CD4+ T Lymphocytes (cells/mm <sup>3</sup> ) [IQR] | 621 [406, 859] | 626 [419, 862]                         | 564 [347, 816]                         |
| HIV Viral Load copies/mL <200, n (%)                     | 1745 (90%)     | 1494 (91%)                             | 251 (87%)                              |

Abbreviations: PLWH, persons living with HIV; SARS CoV-2, severe acute respiratory syndrome coronavirus 2; N, number; SD, standard deviation; IQR, interquartile range; mL, milliliter
